# Supplementary material
Source: Springer Nature journal article supplement (https://www.springermedizin.de/resource/supplementary/12885_2010_2701_MOESM2_ESM.pdf/9461740)

a) Overall survival and surgery

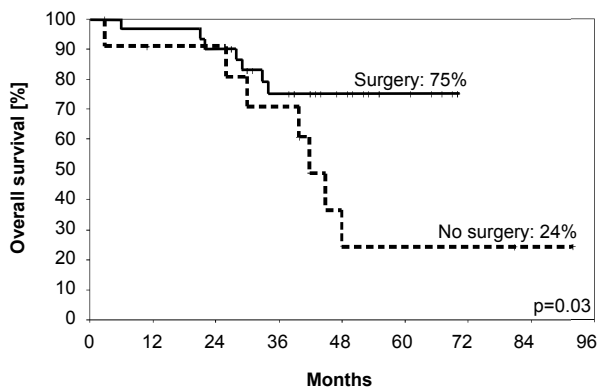

b) Overall survival and resection margin

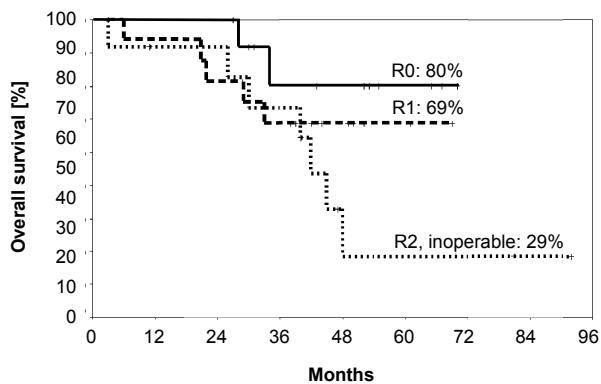

c) Overall survival and time to recurrence

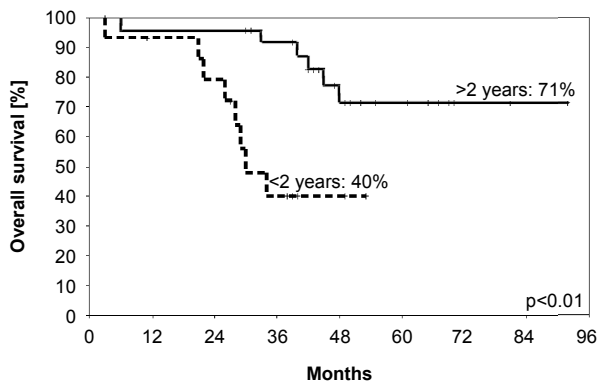

d) Overall survival and nodal involvement

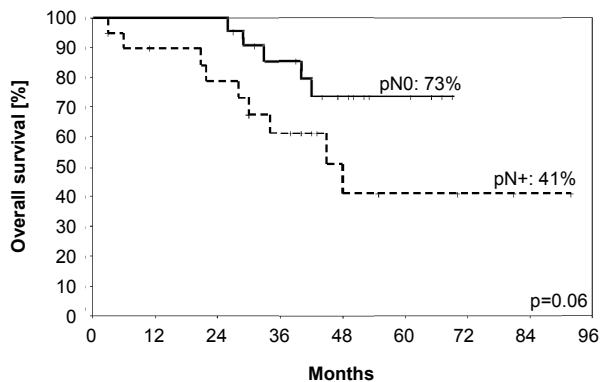

Supplement: MOESM2 [file 9461740]
